# Supplementary material for: The changing composition of the Gulf of St. Lawrence inflow waters observed from transient tracer measurements
Source: Copernicus journal article supplement (doi:10.5194/egusphere-2025-3999), 2025-08-28
Supplement: Supplementary file 1 [file egusphere-2025-3999-supplement.pdf]

Supporting Information for

## **The changing composition of the Gulf of St. Lawrence inflow waters observed from transient tracer measurements**

Lennart Gerke<sup>1,5</sup>, Toste Tanhua<sup>1</sup>, William A. Nesbitt<sup>2</sup>, Samuel W. Stevens<sup>3,4</sup>, Douglas W. R. Wallace<sup>2</sup>

<sup>1</sup>GEOMAR Helmholtz Centre for Ocean Research Kiel, Kiel, 24148, Germany

<sup>2</sup>Department of Oceanography, Dalhousie University, Halifax, B3H 4R2, Canada

<sup>3</sup>Department of Earth and Ocean Sciences, The University of British Columbia, Vancouver, V6T 1Z4, Canada

<sup>4</sup>Hakai Institute, Heriot Bay, British Columbia, V9W 0B7, Canada

<sup>5</sup>[C]Worthy, LLC, Boulder, CO, 80302, USA

## Supplementary Materials

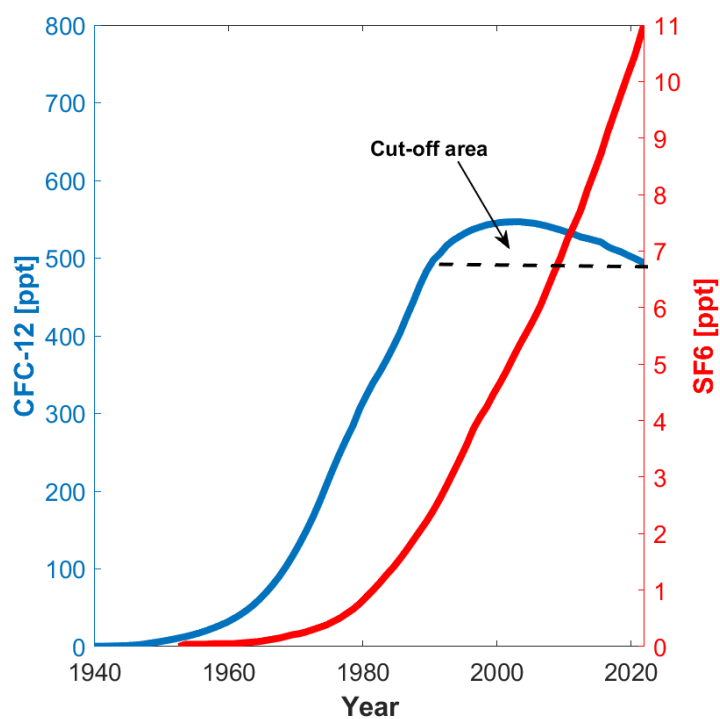

**Figure S1:** Atmospheric concentrations of the two transient tracers used in this study. CFC-12 (blue) with its by now decreasing atmospheric concentration and SF<sub>6</sub> (red) with steadily increasing concentrations since 1960. Both tracer concentrations are represented in ppt (parts per trillion) here.

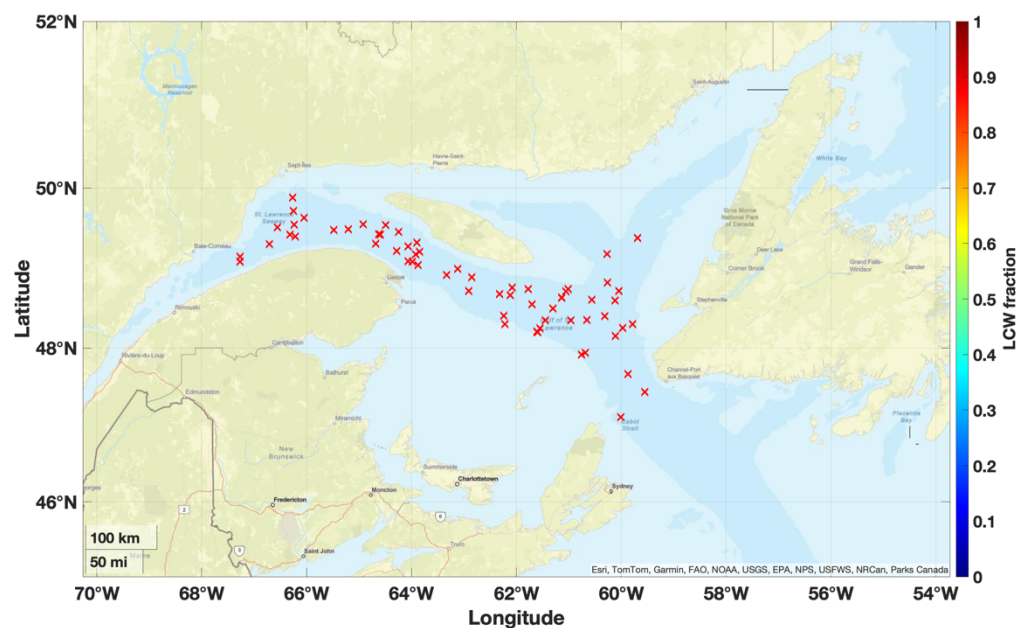

Figure S2: LCW fraction on the  $\sigma_{\theta} = 27.26 \text{ kg/m}^3$  isopycnal deep water in the Laurentian Channel from  $\theta$  and  $S_p$  observations plotted in a map. The red x's representing 0 % LCW fraction.

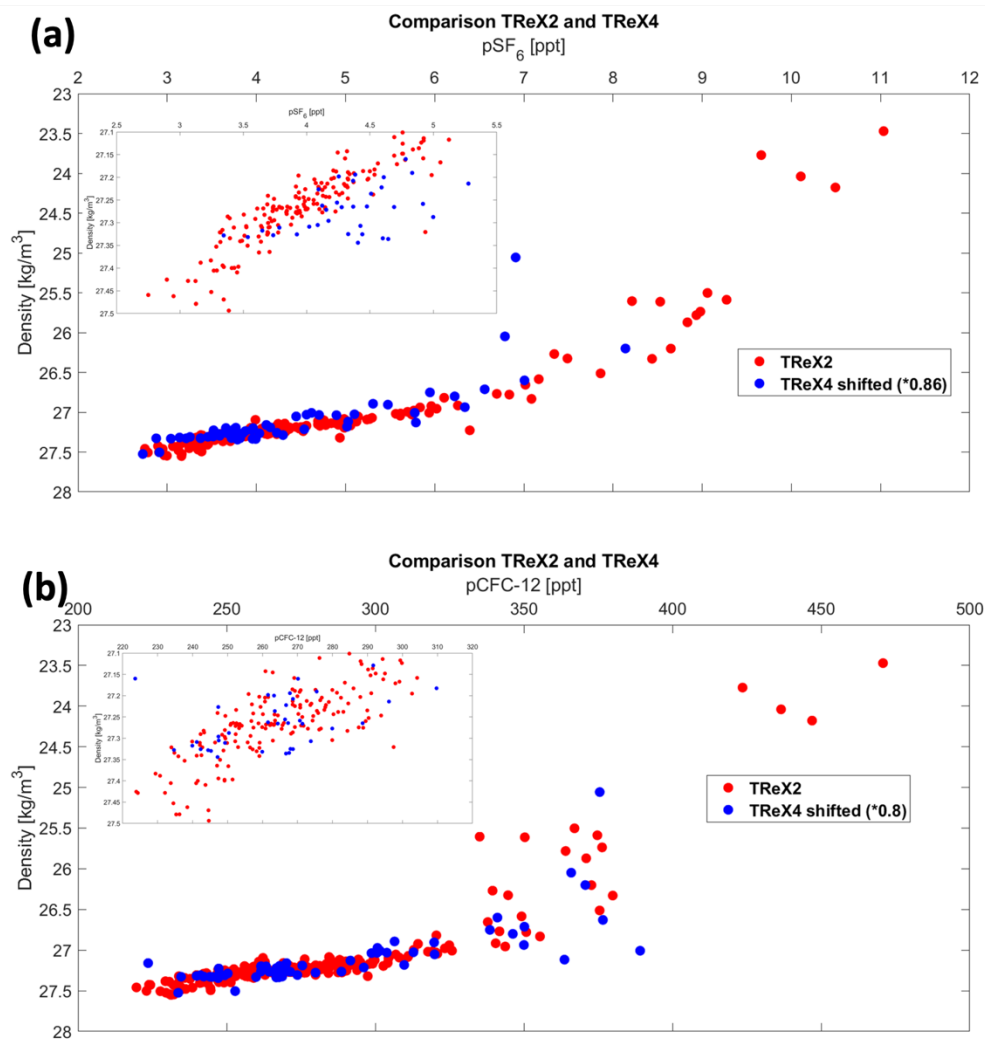

**Figure S3: Display of the TreX 2 and shifted TreX4 data of (a) CFC-12 concentrations and (b)  $\text{SF}_6$  concentrations. Each with a zoom into the area around the  $\sigma_\theta=27.26 \text{ kg/m}^3$  isopycnal, showing a large amount of comparable datapoints.**

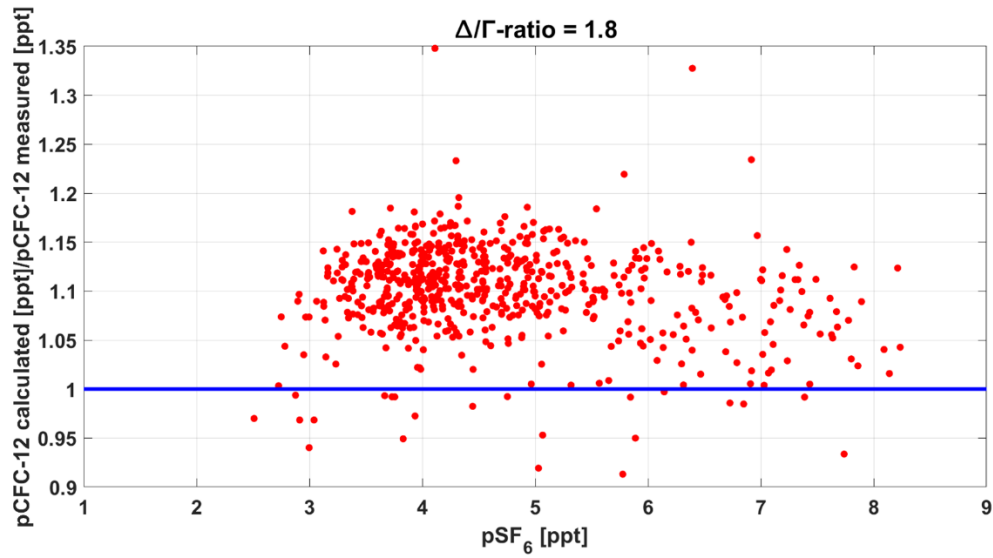

Figure S4: Display of the relationship between calculated and measured CFC-12 against PSF<sub>6</sub> concentrations using a ratio of  $\Delta/\Gamma=1.8$  for the calculation of the CFC-12 concentrations.

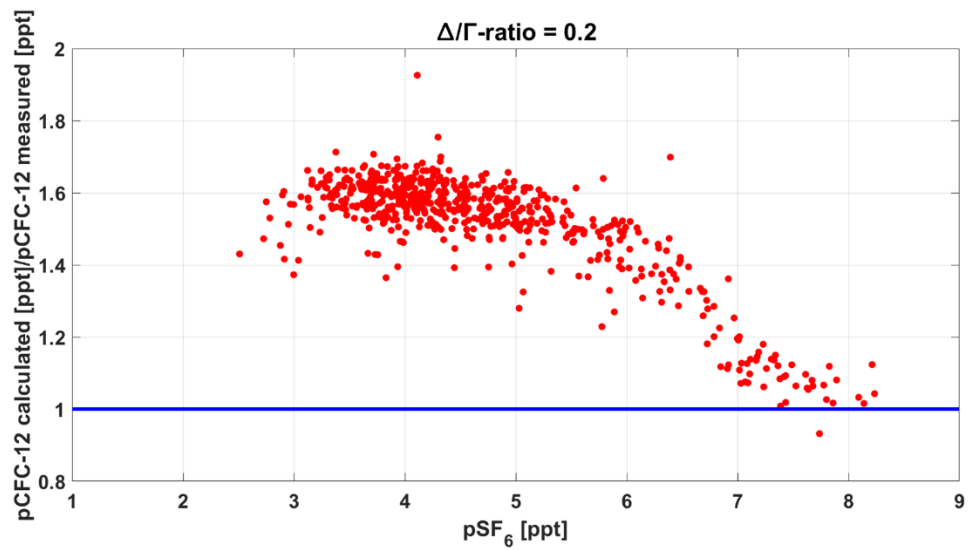

Figure S5: Display of the relationship between calculated and measured CFC-12 against PSF<sub>6</sub> concentrations using a ratio of  $\Delta/\Gamma=0.2$  for the calculation of the CFC-12 concentrations.
